# Supplementary material for: A Comparison of Lung Ultrasound and Computed Tomography in the Diagnosis of Patients with COVID-19: A Systematic Review and Meta-Analysis
Source: MDPI journal article supplement (doi:10.3390/diagnostics11081351), 2021-07-27
Supplement: s1 [file s1]

## Supplementary Material 1

### Annex 1 Search strategies

#### PubMed

- #1 "COVID-19"[Supplementary Concept]
- #2 "Severe Acute Respiratory Syndrome Coronavirus 2"[Supplementary Concept]
- #3 "COVID-19"[Title/Abstract]
- #4 "SARS-COV-2"[Title/Abstract]
- #5 "Novel coronavirus" [Title/Abstract]
- #6 "2019-novel coronavirus" [Title/Abstract]
- #7 "coronavirus disease-19" [Title/Abstract]
- #8 "coronavirus disease 2019" [Title/Abstract]
- #9 "COVID19" [Title/Abstract]
- #10 "Novel CoV" [Title/Abstract]
- #11 "2019-nCoV" [Title/Abstract]
- #12 "2019-CoV" [Title/Abstract]
- #13 OR/#1-12
- #14 ultrasound\*[Title/Abstract]
- #15 POCUS[Title/Abstract]
- #16 ultrasound [MeSH Terms]
- #17 OR/#14-16
- #18 "radiography, thoracic"[MeSH Terms]
- #19 "computed tomography"[Title/Abstract]
- #20 "radiograph\*"[Title/Abstract]
- #21 "imagin\*"[Title/Abstract]
- #22 OR/#18-#21
- #23 #13 AND #17 AND #22

#### Cochrane library

- #1 "COVID-19":ti,ab,kw
- #2 "SARS-COV-2":ti,ab,kw
- #3 "Novel coronavirus":ti,ab,kw
- #4 "2019-novel coronavirus" :ti,ab,kw
- #5 "Novel CoV" :ti,ab,kw
- #6 "2019-nCoV" :ti,ab,kw
- #7 "2019-CoV" :ti,ab,kw
- #8 "coronavirus disease-19" :ti,ab,kw
- #9 "coronavirus disease 2019" :ti,ab,kw

#10 "COVID19" :ti,ab,kw  
#11 OR/#1-10  
#12 MeSH descriptor: [Ultrasonography, Doppler] explode all trees  
#13 (ultrasound\*):ti,ab,kw  
#14 (ultrasonography\*):ti,ab,kw  
#15 POCUS:ti,ab,kw  
#16 OR/12-15  
#17 #11 AND #16

### **Embase**

#1. 'COVID-19':ab,ti  
#2. 'SARS-COV-2':ab,ti  
#3. 'novel coronavirus':ab,ti  
#4. '2019-novel coronavirus':ab,ti  
#5. 'coronavirus disease-19':ab,ti  
#6. 'coronavirus disease 2019':ab,ti  
#7. 'COVID19':ab,ti  
#8. 'novel cov':ab,ti  
#9. '2019-ncov':ab,ti  
#10. '2019-cov':ab,ti  
#11. 'coronavirus disease 2019'/exp  
#12. OR/#1-11  
#13. 'ultrasound'/exp  
#14. pocus:ti,ab  
#15. ultrasound:ti,ab  
#16. OR/#13-15  
#17. #12 AND #16

### **WHO COVID-19 Global literature on coronavirus disease**

#1 COVID-19: ti  
#2 ultrasound\*: ti  
#3 #1 AND #2

### **CBM**

#1 “新型冠状病毒” [常用字段:智能]  
#2 “2019-nCoV” [常用字段:智能]  
#3 “2019-CoV” [常用字段:智能]  
#4 “COVID-19” [常用字段:智能]  
#5 "COVID 19" [常用字段:智能]

- #6 “SARS-CoV-2” [常用字段:智能]
- #7 “超声检查”[不加权:扩展]
- #8 “超声”[常用字段:智能]
- #9 “回声检查”[常用字段:智能]
- #10 “回波断层摄影术”[常用字段:智能]
- #11 “彩色多普勒”[常用字段:智能]
- #12 “二维超声”[常用字段:智能]
